# Supplementary material for: Genetic Testing at Diagnosis Has Prognostic Value in Patients with Chronic Lymphocytic Leukemia including at Early Stages
Source: MDPI journal article supplement (doi:10.3390/diagnostics12081802), 2022-07-25
Supplement: s1 [file s1]

## SUPPLEMENTARY DATA

**Supplementary Figure S1.** Kaplan-Meier treatment-free survival curves for early-stage patients according to lymphocyte count, **A)** Rai stages 0-2, and **B)** Binet stages A.

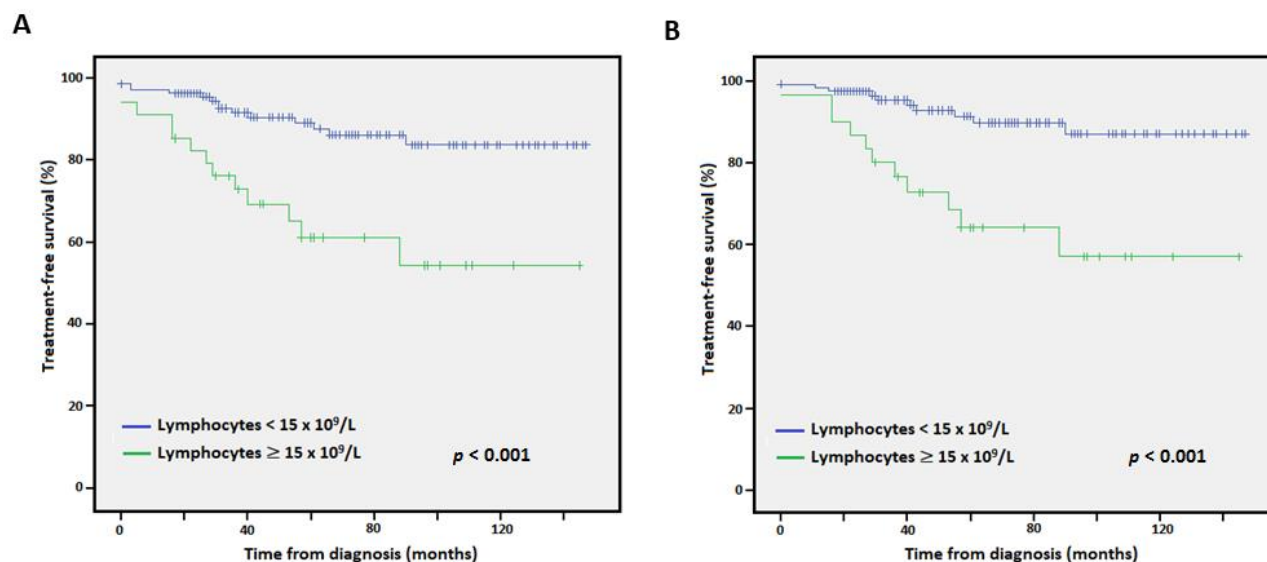

**Supplementary Table S1.** Characteristics of the consecutive series of adult CLL patients.

| Characteristic                           | Total | n/mean (% or range) |
|------------------------------------------|-------|---------------------|
| <b>Age, mean (years)</b>                 | 217   | 70 (16-91)          |
| <b>Sex</b>                               | 217   |                     |
| Male                                     |       | 123 (57.1)          |
| Female                                   |       | 94 (42.9)           |
| <b>Rai stage</b>                         | 217   |                     |
| 0                                        |       | 154 (70.6)          |
| I                                        |       | 38 (17.4)           |
| II                                       |       | 10 (4.6)            |
| III-IV                                   |       | 15 (6.9)            |
| <b>Binet stage</b>                       | 217   |                     |
| A                                        |       | 174 (80.2)          |
| B                                        |       | 34 (15.7)           |
| C                                        |       | 9 (4.1)             |
| <b>IPI</b>                               | 70    |                     |
| Low                                      |       | 37 (52.9)           |
| Intermediate                             |       | 19 (27.1)           |
| High                                     |       | 12 (17.1)           |
| Very high                                |       | 2 (2.9)             |
| <b>Treatment</b>                         | 215   |                     |
| No                                       |       | 160 (74.4)          |
| Yes                                      |       | 55 (25.6)           |
| <b>Treatment type</b>                    | 57    |                     |
| FCR                                      |       | 15                  |
| Chlorambucil                             |       | 15                  |
| Ibrutinib                                |       | 8                   |
| R-Benda                                  |       | 7                   |
| Chlorambucil + Obinutuzumab              |       | 5                   |
| Rituximab                                |       | 3                   |
| CHOP/R-CHOP                              |       | 2                   |
| Alentuzumab + TPH                        |       | 1                   |
| Radiotherapy                             |       | 1                   |
| <b>Beta-2 microglobulin, mean (mg/L)</b> | 150   | 2.4 (1.1-16.1)      |
| <b>Hierarchic FISH category</b>          |       |                     |
| 17p deletion                             | 150   | 9 (6)               |
| 11q deletion                             | 148   | 8 (5.4)             |
| 12 trisomy                               | 149   | 31 (20.8)           |
| 13q deletion                             | 149   | 75 (50.3)           |
| <b>IGHV mutation status</b>              | 109   |                     |
| Unmutated                                |       | 41 (37.6)           |
| Mutated                                  |       | 68 (62.4)           |
| <b>Exitus</b>                            | 217   |                     |
| No                                       |       | 177 (81.6)          |
| Yes                                      |       | 22 (10.1)           |
| Lost to follow-up                        |       | 18 (8.3)            |

**Supplementary Table S2.** Five-year overall survival of the CLL-IPI categories [18] versus our series of CLL patients. OS, overall survival; iwCLL, International Workshop on Chronic Lymphocytic Leukemia (2018) [6].

|                   |  | iwCLL series |               |  | Our series |               |
|-------------------|--|--------------|---------------|--|------------|---------------|
| CLL-IPI category  |  | <i>n</i>     | 5-year OS (%) |  | <i>n</i>   | 5-year OS (%) |
| Low-risk          |  | 341          | 93.2          |  | 36         | 100.0         |
| Intermediate-risk |  | 474          | 79.3          |  | 19         | 94.0          |
| High-risk         |  | 337          | 63.3          |  | 12         | 74.0          |
| Very high-risk    |  | 62           | 23.3          |  | 2          | -             |
